# Supplementary material
Source: PubMed Central journal article supplement (PMC4480422)
Supplement: NIHMS681479-supplement-Supp_FigureS1-S4.pdf [file NIHMS681479-supplement-Supp_FigureS1-S4.pdf]

**Web-based Supporting Materials for “The Impact of  
Covariate Measurement Error on Risk Prediction” by  
Khudyakov P, Gorfine M, Zucker D, Spiegelman D**

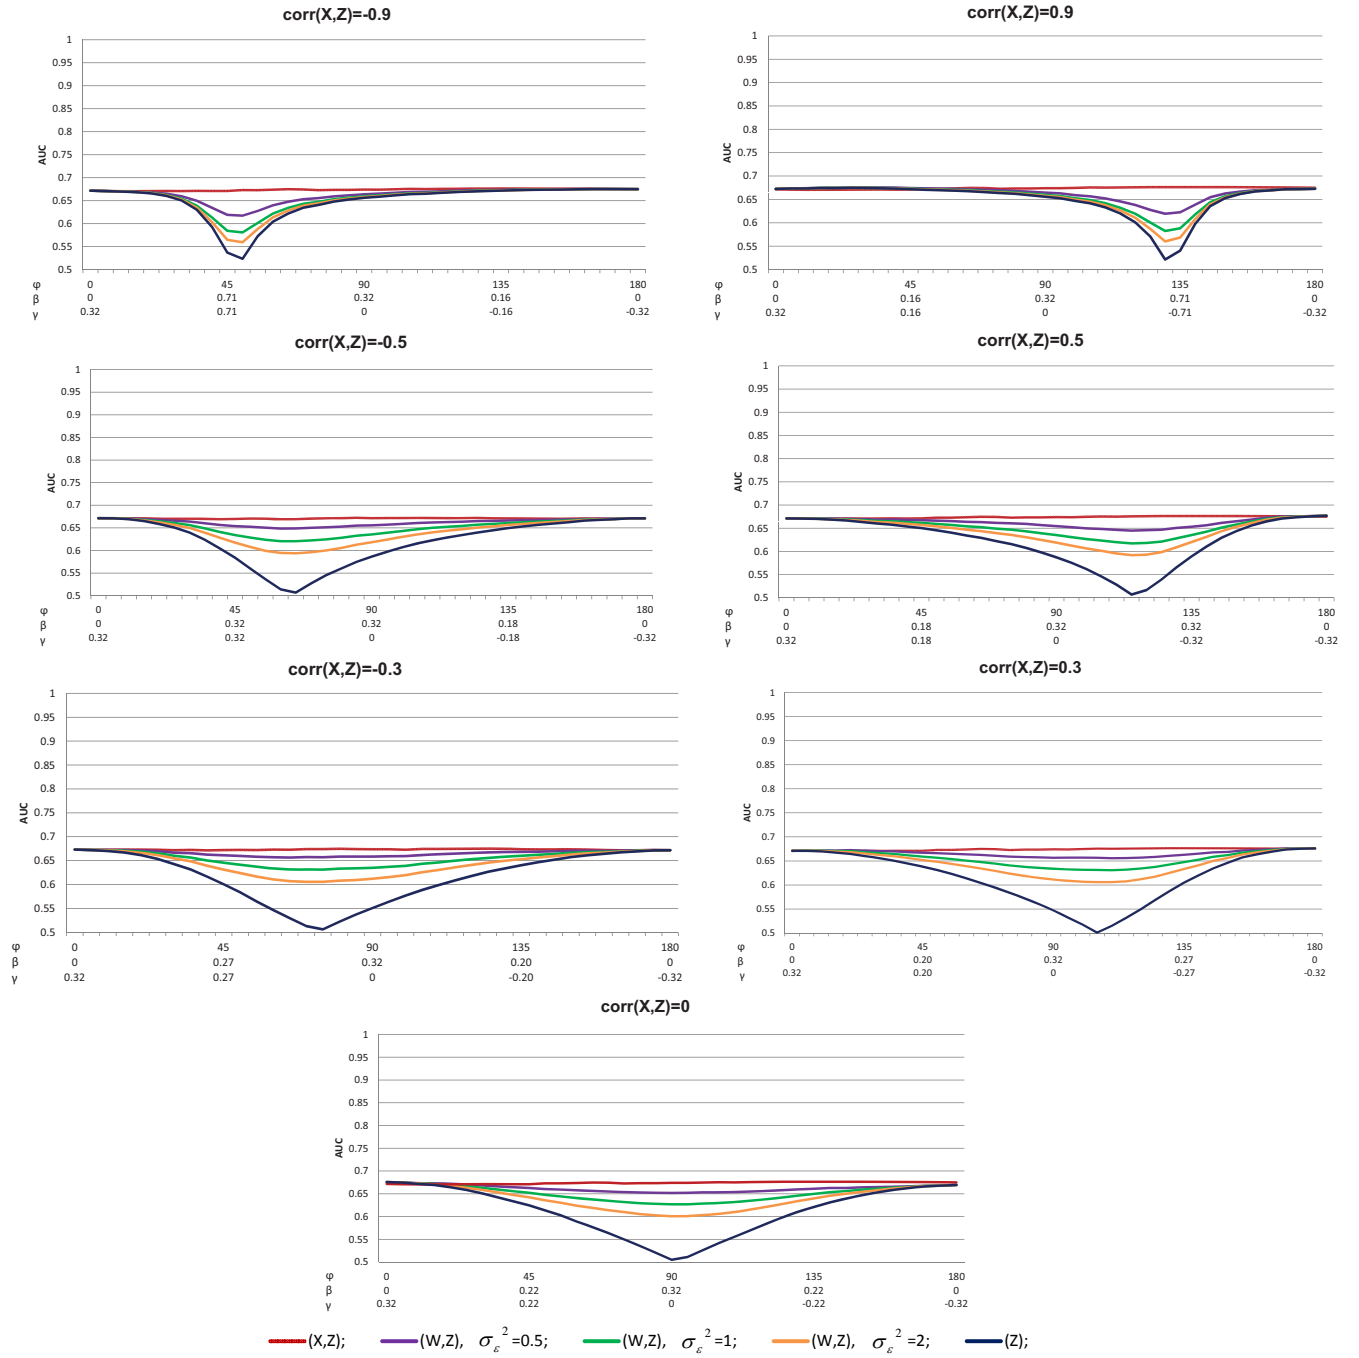

Figure S1: AUCs of the homoscedastic error model,  $R^2 = 0.1$ ,  $p = 0.1$  and various values of  $\rho_{X,Z} = \text{corr}(X, Z)$ .

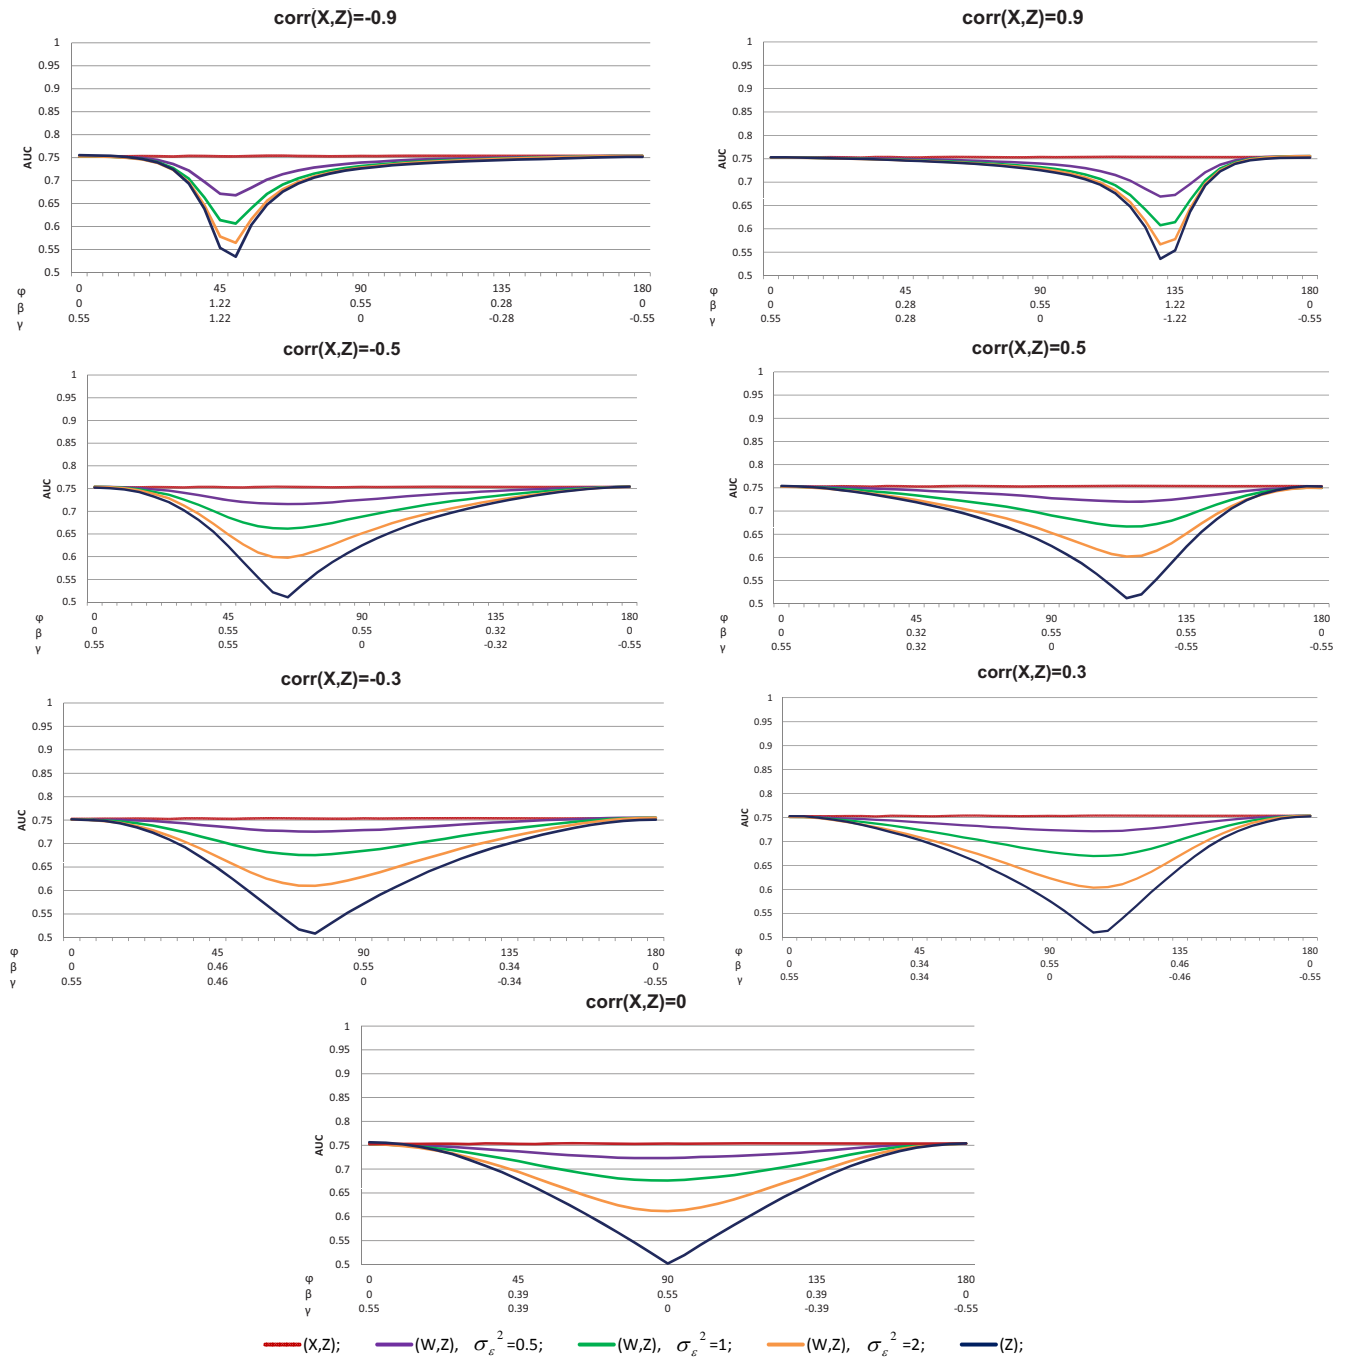

Figure S2: AUCs of the homoscedastic error model,  $R^2 = 0.3$ ,  $p = 0.1$  and various values of  $\rho_{X,Z} = \text{corr}(X, Z)$ .

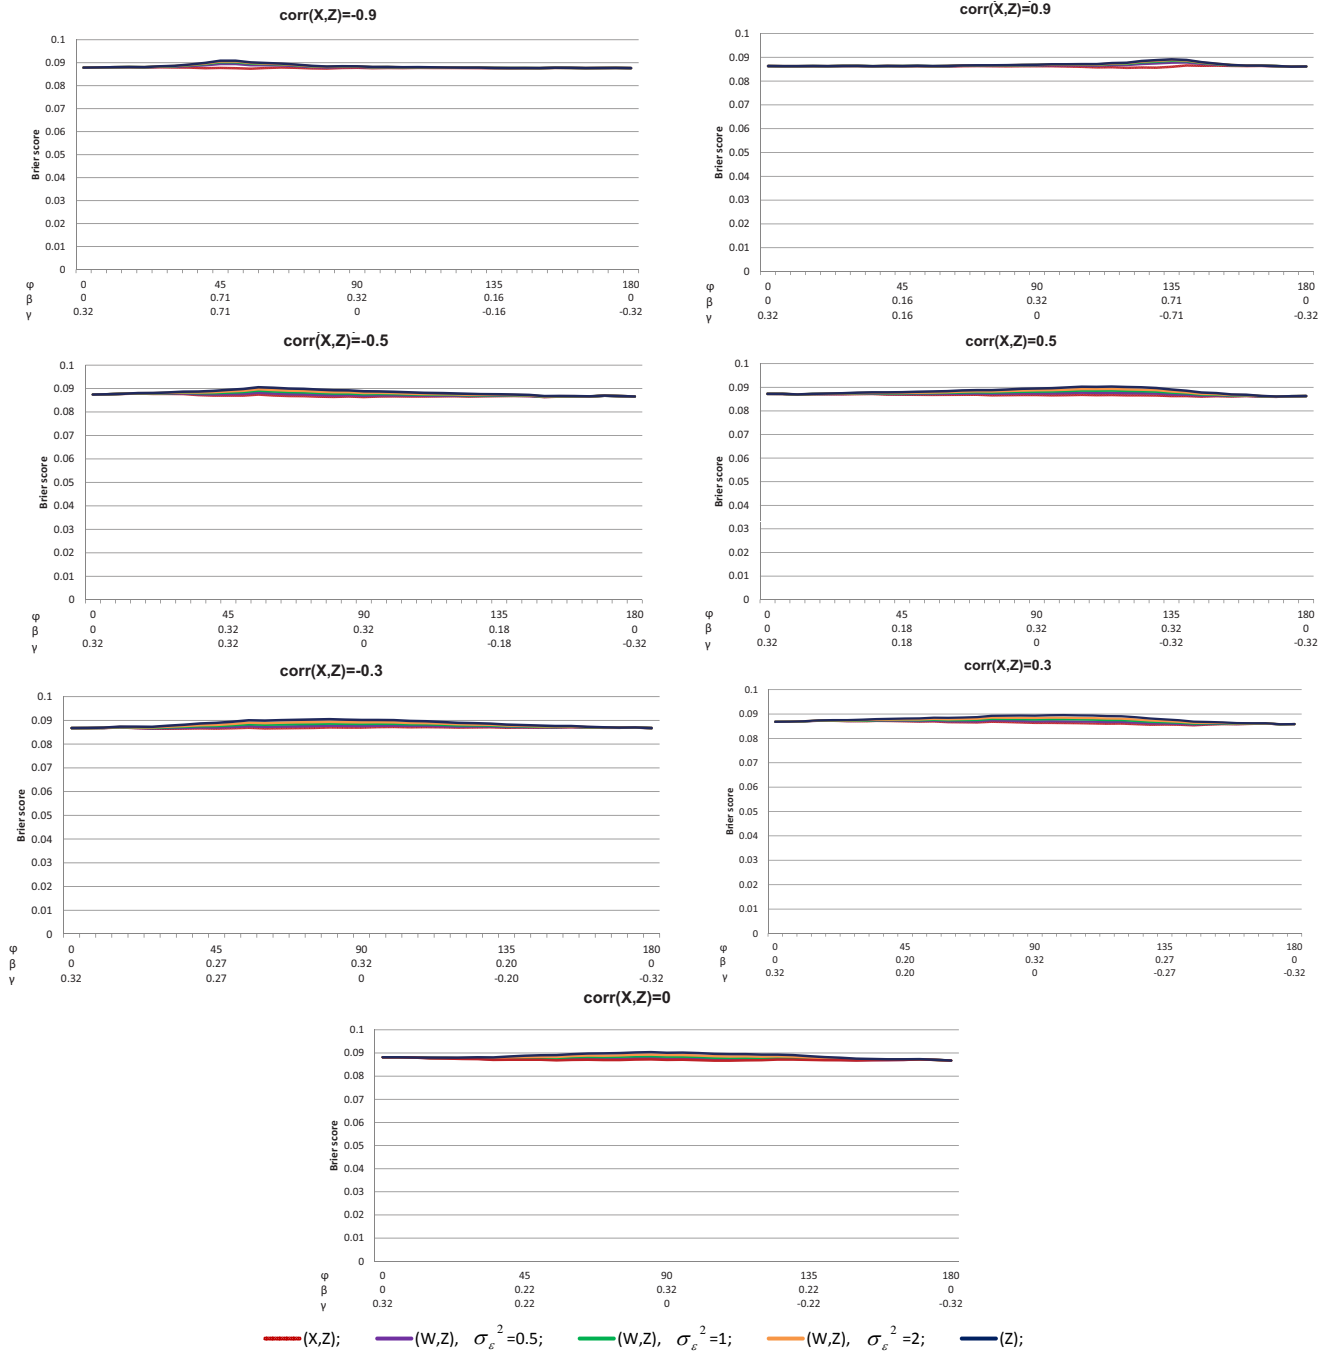

Figure S3: BS of the homoscedastic error model,  $R^2 = 0.1$ ,  $p = 0.1$  and various values of  $\rho_{X,Z} = \text{corr}(X, Z)$ .

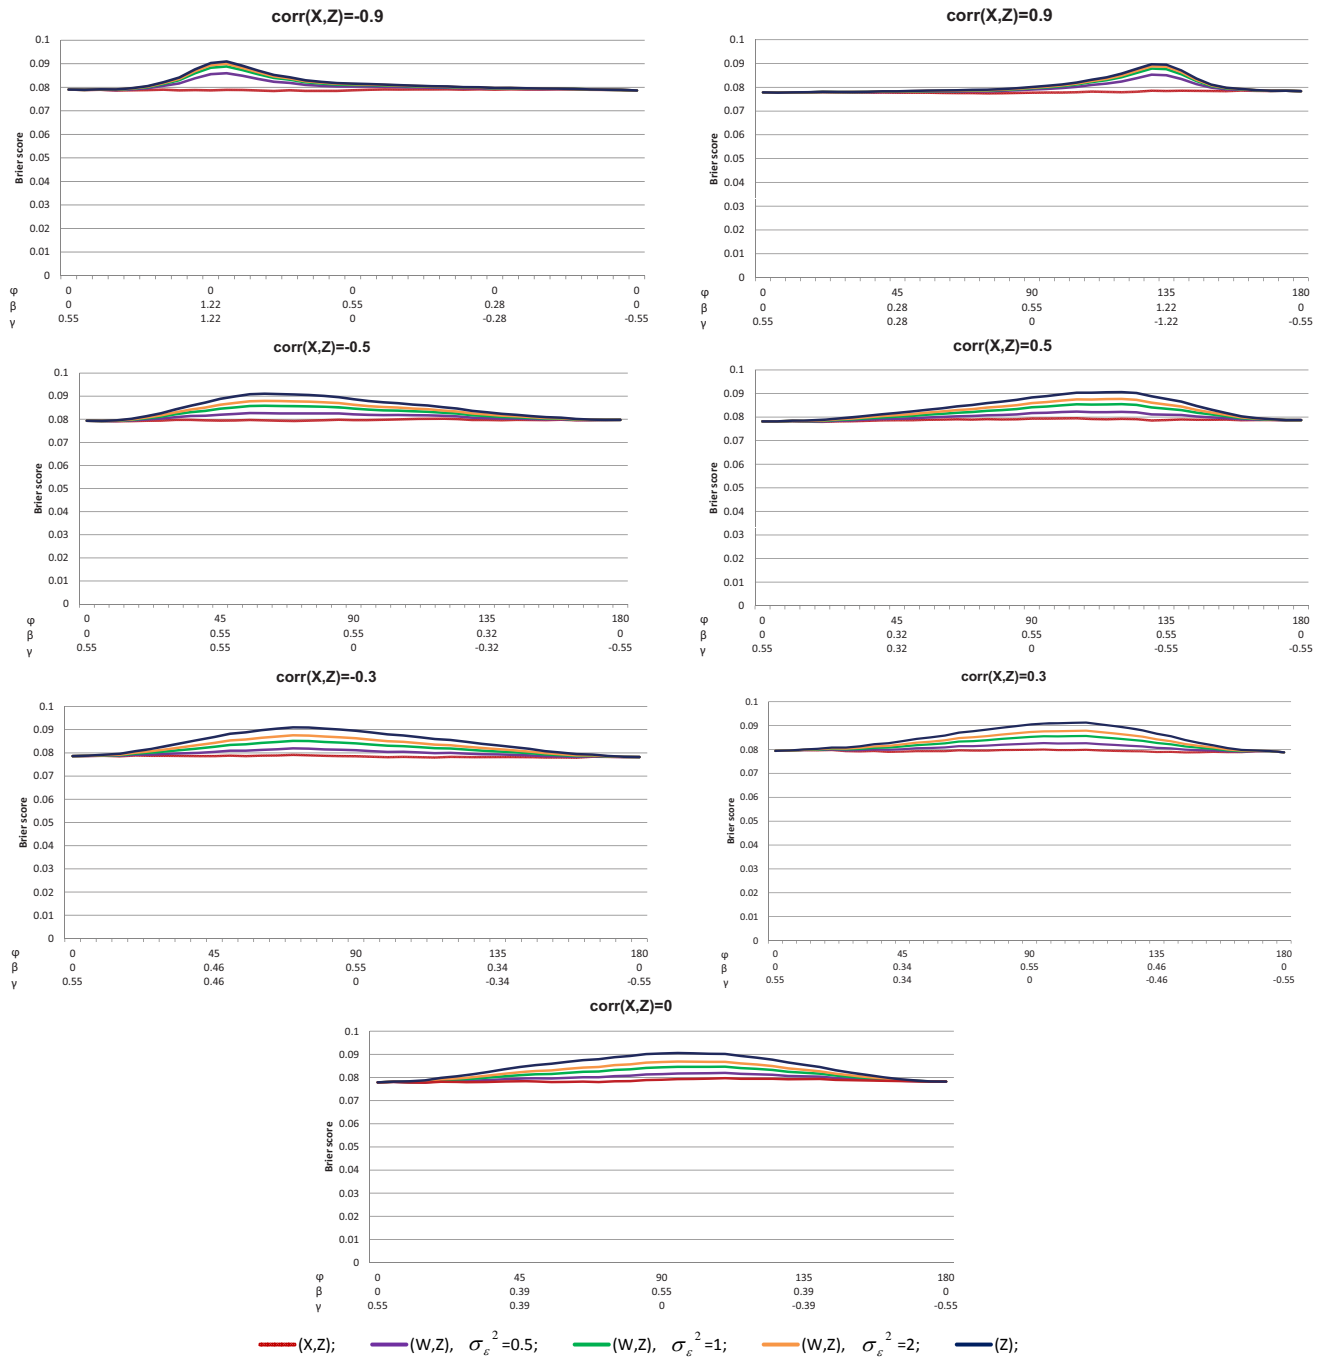

Figure S4: BS of the homoscedastic error model,  $R^2 = 0.3$ ,  $p = 0.1$  and various values of  $\rho_{X,Z} = \text{corr}(X, Z)$ .

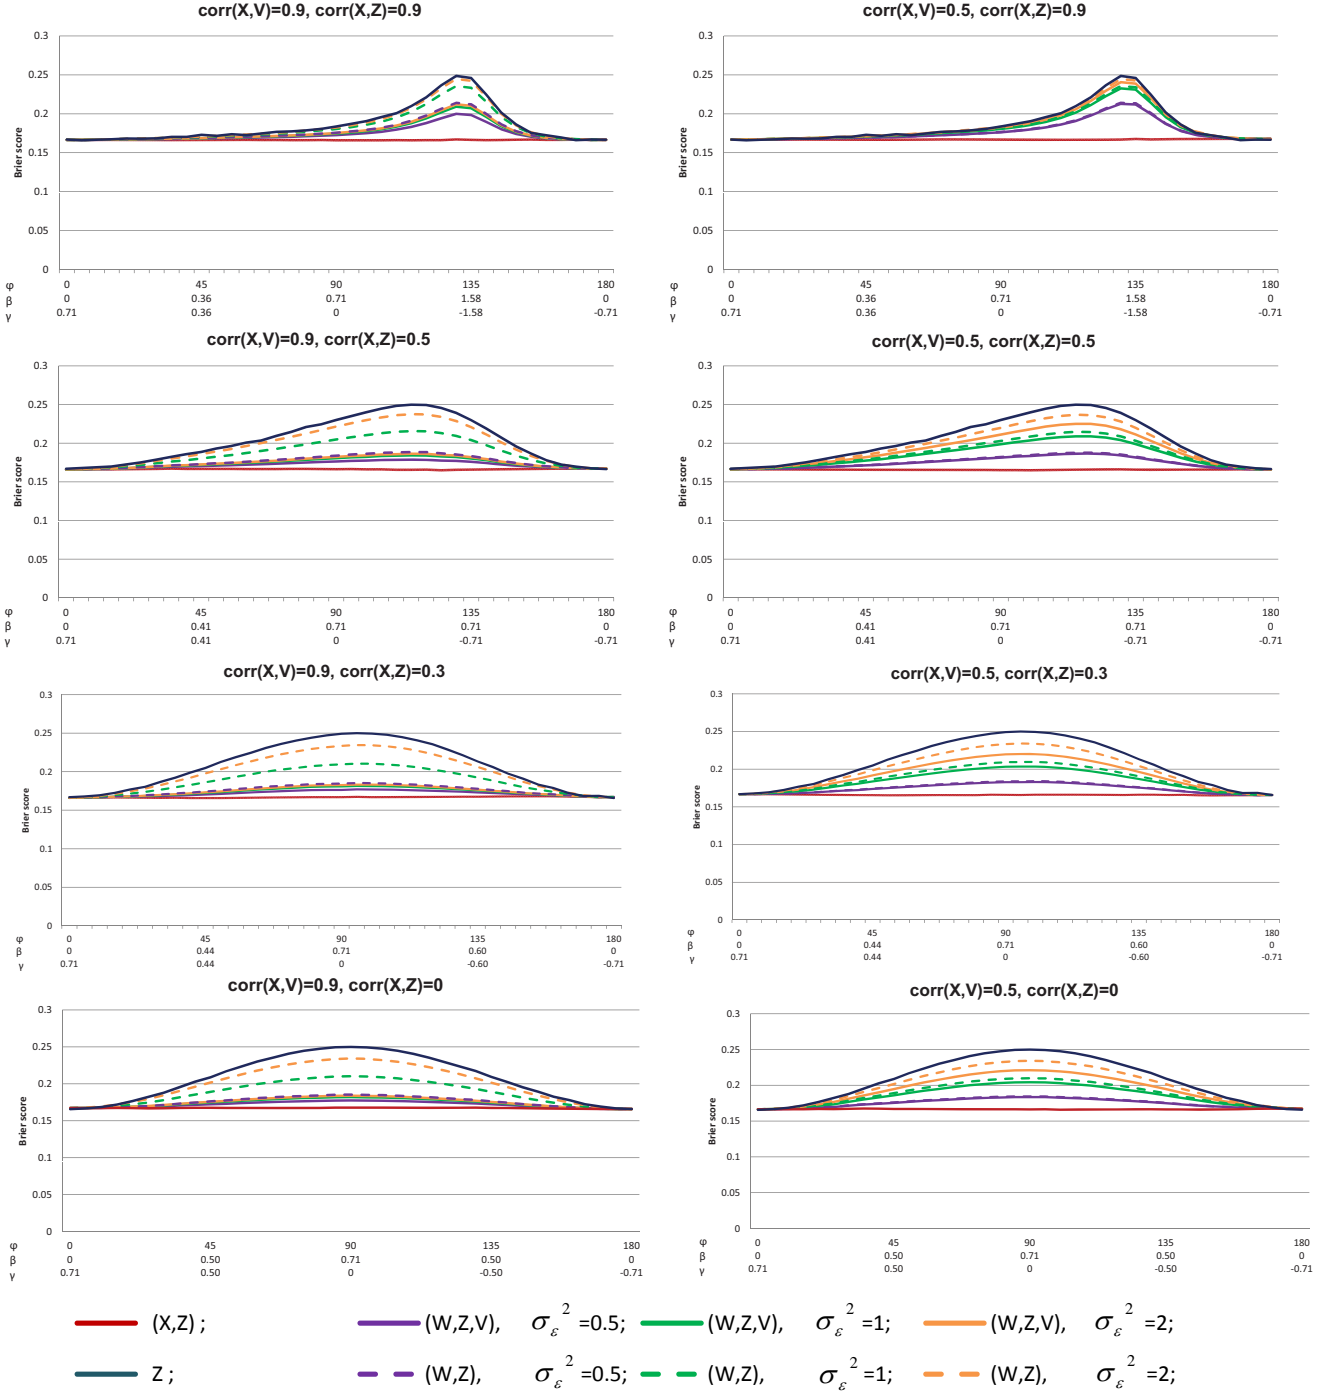

Figure S5: The effect of AV on BS: the homoscedastic error model,  $R^2 = 0.5$ ,  $p = 0.5$ , various values of  $\rho_{X,Z} = \text{corr}(X, Z)$  and  $\rho_{X,V} = \text{corr}(X, V)$
